# Supplementary material for: Effects of Single Amino Acid Substitution on the Biophysical Properties and Biological Activities of an Amphipathic α-Helical Antibacterial Peptide Against Gram-Negative Bacteria
Source: PubMed Central journal article supplement (PMC6271477; doi:10.3390/molecules190810803), 2014-07-24

## Supplementary File

**Figure S1.** Trp fluorescence emission spectrum of 2  $\mu$ M peptide analogs upon interacting without (triangles) or with vesicles composed of PC:PG (7:3, w/w) (squares) or PC/cholesterol (8:1, w/w) (circles).

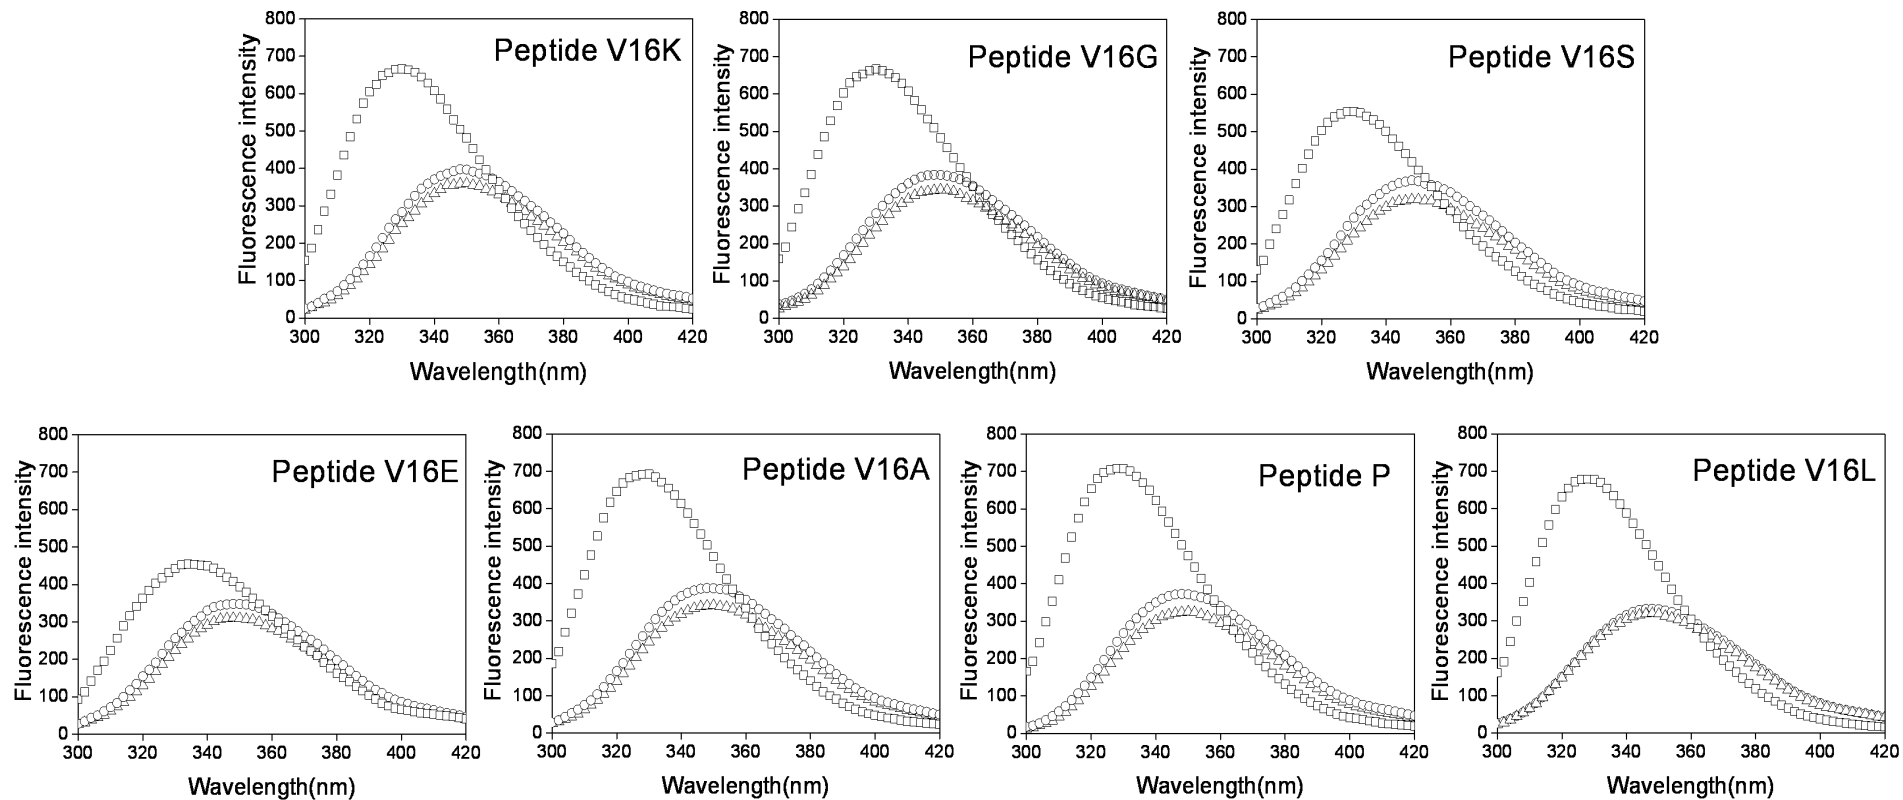

Supplement: molecules-19-10803-s001.pdf [file molecules-19-10803-s001.pdf]
